# Supplementary material for: Tianhuang formula regulates adipocyte mitochondrial function by AMPK/MICU1 pathway in STZ-induced T2DM mice
Source: Research Square preprint supplement (doi:10.21203/rs.3.rs-2317288/v1), 2022-12-16
Supplement: Supplementary file 1 [file ea6a8759096a442471e97557.pdf]

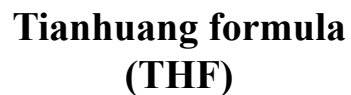

**C57BL/6J**

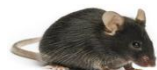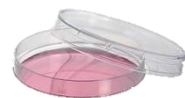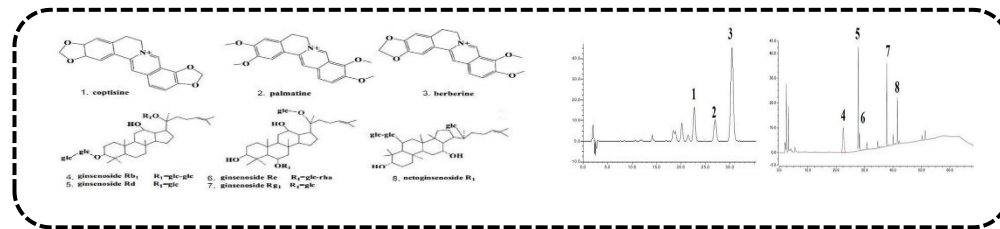

### Quantitative profiling of THF

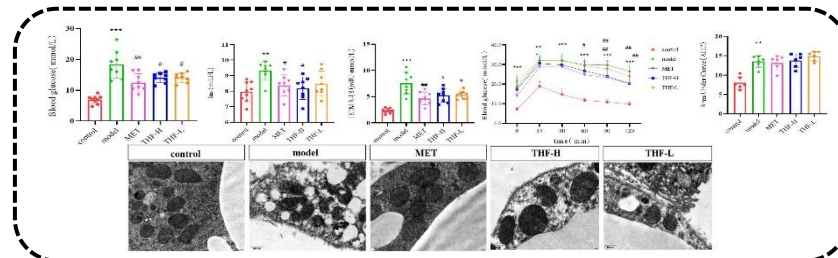

## THF improved the glucose and lipid metabolism in T2DM mice

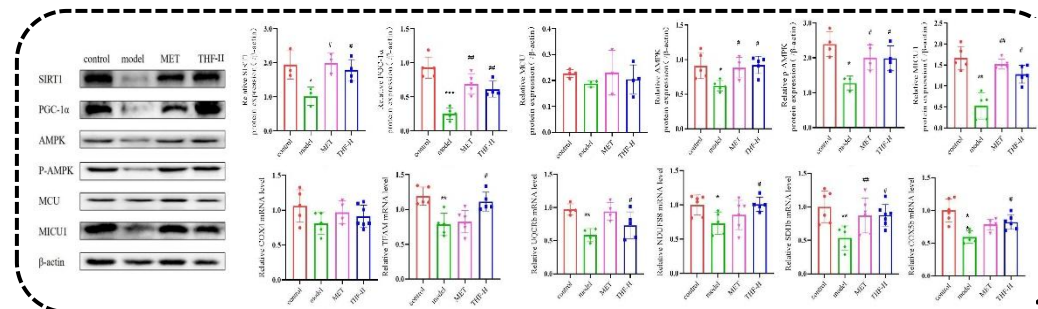

### THF improved the mitochondrial function of VAT in T2DM mice through AMPK-MICU1 pathway

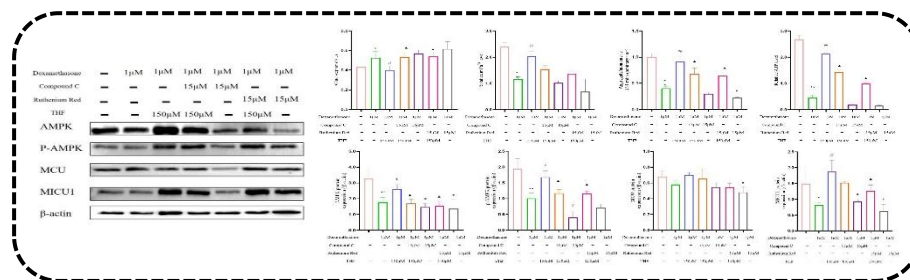

### THF attenuated IR by AMPK-MICU1 pathway in 3T3-L1 adipocyte

**THF has the anti-T2DM effect**
